# Supplementary material for: Clinical and Genetic Characterisation of Cystic Fibrosis Patients in Latvia: A Twenty-Five-Year Experience
Source: MDPI journal article supplement (doi:10.3390/diagnostics12112893), 2022-11-21
Supplement: s1 [file s1]

Supplement

**Table S1.** Genotypes of Latvian CF patients diagnosed between 1997 and 2022 and information about these genotypes held in the CFTR2 database (last updated April 29, 2022).

| Genotype according to traditional nomenclature | 1 <sup>st</sup> allele according to HGVS | 2nd allele according to HGVS                 | N          | %    | Genotype described in n individuals cftr2.org database | Pancreatic function reported cftr2.org database <sup>a</sup> |
|------------------------------------------------|------------------------------------------|----------------------------------------------|------------|------|--------------------------------------------------------|--------------------------------------------------------------|
| F508del/F508del                                | c.1521_1523delCTT p.(Phe508del)          | c.1521_1523delCTT p.(Phe508del)              | 34         | 48.5 | 33,984                                                 | PI (2%PS)                                                    |
| F508del/3849+10kb C>T                          | c.1521_1523delCTT p.(Phe508del)          | c.3718-2477C>T p.(?)                         | 2          | 2.8  | 260                                                    | PS (35%PI)                                                   |
| F508del/W1282R                                 | c.1521_1523delCTT p.(Phe508del)          | c.3844T>C p.(Trp1282Arg)                     | 1 (2 sibs) | 2.8  | Second variants not reported in cftr2.org              | NA                                                           |
| F508del/W1282X                                 | c.1521_1523delCTT p.(Phe508del)          | c.3846G>A p.(Trp1282Ter)                     | 1          | 1.4  | 770                                                    | PI(2%PS)                                                     |
| F508del/R1066H                                 | c.1521_1523delCTT p.(Phe508del)          | c.3197G>A p.(Arg1066His)                     | 3          | 4.2  | 56                                                     | PS(31%PI)                                                    |
| F508del/2143delT                               | c.1521_1523delCTT p.(Phe508del)          | c.2012delT p.(Leu671Ter)                     | 1          | 1.4  | 66                                                     | PI(6%PS)                                                     |
| F508del/dele 2,3                               | c.1521_1523delCTT p.(Phe508del)          | c.54-5940_273+10250del21kb p.(Ser18ArgfsX16) | 2          | 2.8  | 260                                                    | PI(0%PS)                                                     |
| F508del/W57R                                   | c.1521_1523delCTT p.(Phe508del)          | c.169T>C p.(Trp57Arg)                        | 2          | 2.8  | Second allele not reported                             |                                                              |
| F508del/394delTT                               | c.1521_1523delCTT p.(Phe508del)          | c.262_263delTT p.(Leu88IlefsX22)             | 1          | 1.4  | 209                                                    | PI(2%PS)                                                     |
| F508del/2184insA                               | c.1521_1523delCTT p.(Phe508del)          | c.2052dupA p.(Gln685ThrfsX4)                 | 1          | 1.4  | 220                                                    | PI(13%PS)                                                    |
| F508del/ CFTRdup6b-10                          | c.1521_1523delCTT p.(Phe508del)          | c.(743+1_744-1)_(1584+1_1585-1)dup p.(?)     | 1 (2 sibs) | 2.8  | 13                                                     | PI(0%PS)                                                     |
| F508del/del6-10                                | c.1521_1523delCTT p.(Phe508del)          | c.(743+1_744-1)_(1584+1_1585-1)del p.(?)     | 1 (2 sibs) | 2.8  | Second allele not reported                             |                                                              |
| F508del/L1335Pro                               | c.1521_1523delCTT p.(Phe508del)          | c.4004T>C p.(Leu1335Pro)                     | 2          | 2.8  | 11                                                     | 55% PI/45%PS                                                 |
| F508del/L138ins                                | c.1521_1523delCTT p.(Phe508del)          | c.413_415dupTAC p.(Leu138dup)                | 1          | 1.4  | Not reported genotype                                  |                                                              |
| F508del/621+1G>T                               | c.1521_1523delCTT p.(Phe508del)          | c.489+1G>T p.(?)                             | 1          | 1.4  | 884                                                    | PI                                                           |
| F508del/R334W                                  | c.1521_1523delCTT p.(Phe508del)          | c.1001G>A p.Arg334Gln                        | 1          | 1.4  | 231                                                    | PS                                                           |

|                      |                                                     |                                                     |            |     |                                      |                                   |
|----------------------|-----------------------------------------------------|-----------------------------------------------------|------------|-----|--------------------------------------|-----------------------------------|
| F508del/A455E        | c.1521_1523delCTT<br>p.(Phe508del)                  | c.1364C>A p.Ala455Glu                               | 1          | 1.4 | 355                                  | PS (33% PI)                       |
| W1282R/2143delT      | c.3844T>C p.Trp1282Arg                              | c.2012delT p.Leu671Ter                              | 1          | 1.4 | Not re-<br>ported sec-<br>ond allele | Pancreas<br>function <sup>a</sup> |
| Dele2,3/dele2,3      | c.54-<br>5940_273+10250del21kb<br>p.(Ser18ArgfsX16) | c.54-<br>5940_273+10250del21kb<br>p.(Ser18ArgfsX16) | 1          | 1.4 | 17                                   | PI (6%PS)                         |
| 1677delTA/1677delTA  | c.1545_1546delTA<br>p.(Tyr515ter)                   | c.1545_1546delTA<br>p.(Tyr515ter)                   | 1          | 1.4 | 32                                   | PI (0%PS)                         |
| Dele2,3/P67L         | c.54-<br>5940_273+10250del21kb<br>p.Ser18ArgfsX16   | c.200C>T p.Pro67Leu                                 | 1          | 1.4 | Not re-<br>ported<br>genotype        |                                   |
| W1282X/R553X         | c.3846G>A p.Trp1282X                                | c.1657C>T p.Arg553X                                 | 1 (2 sibs) | 2.8 | 7                                    | PI (14%PS)                        |
| Ser168Ter/Leu1335Pro | c.503C>A<br>p.Ser168Ter                             | c.4004T>C p.Leu1335Pro                              | 1          | 1.4 | Second al-<br>lele not re-<br>ported |                                   |
| F508del/NA           | c.1521_1523delCTT<br>p.(Phe508del)                  | -                                                   | 3          | 4.2 | NA                                   |                                   |
| R553X/NA             | c.1657C>T p.Arg553X                                 | =                                                   | 1          | 1.4 | NA                                   |                                   |

<sup>a</sup>Pancreas function data gained from the cfr2.org database from reported patients; PI – pancreas insufficient, PS – pancreas sufficient, NA – not available or detected.
